# Supplementary material
Source: PubMed Central journal article supplement (PMC1595456)

**A**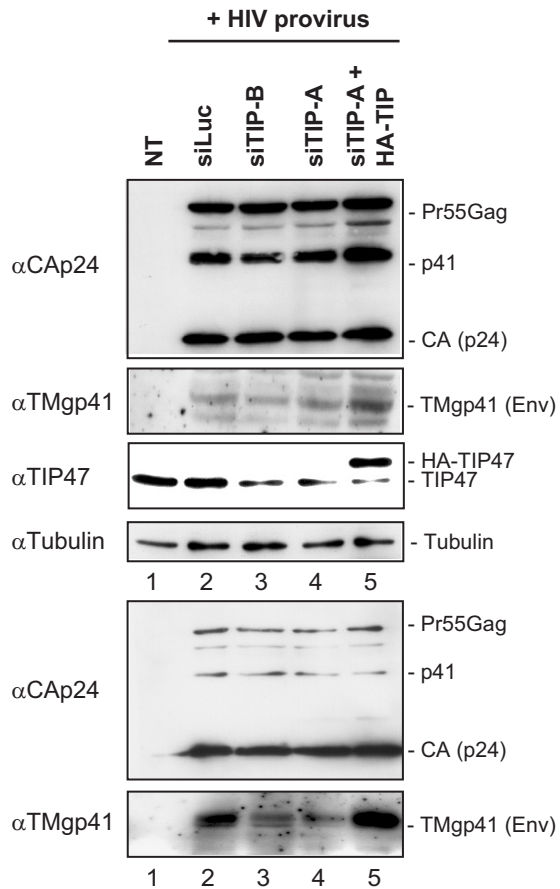**B**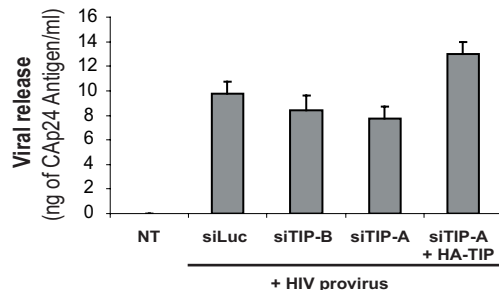**C**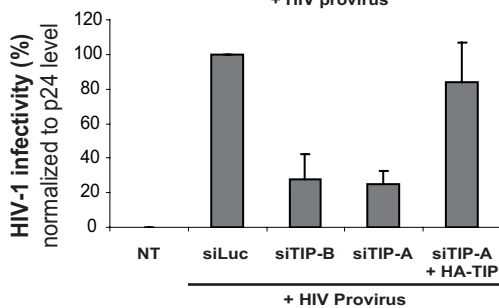**D**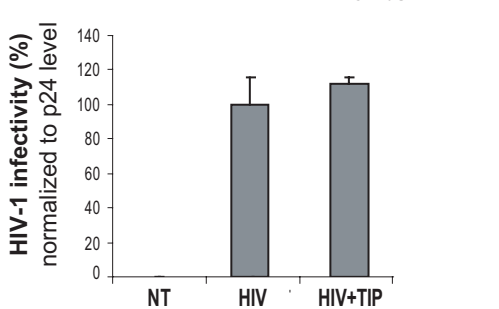

Supplement: pnas_0602941103_1.pdf [file pnas_0602941103_1.pdf]

**A**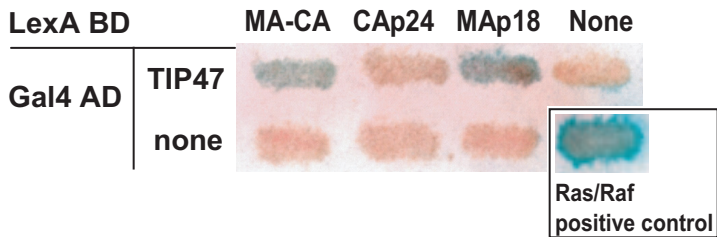**B**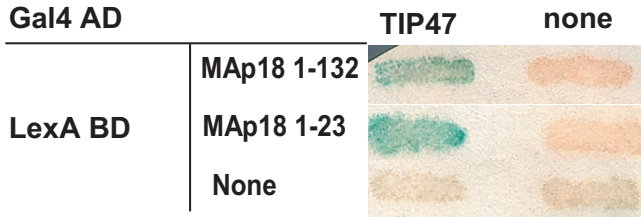

Supplement: pnas_0602941103_2.pdf [file pnas_0602941103_2.pdf]

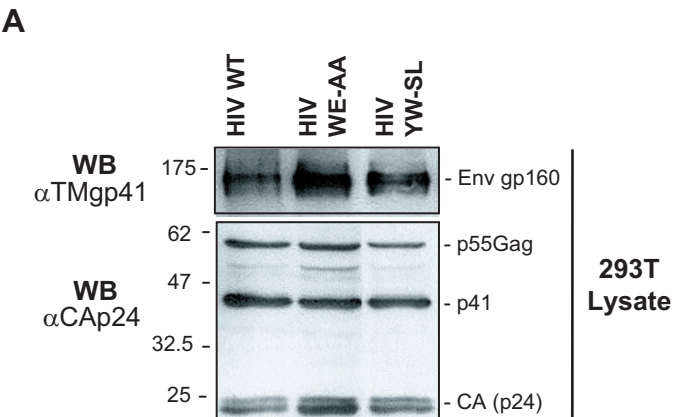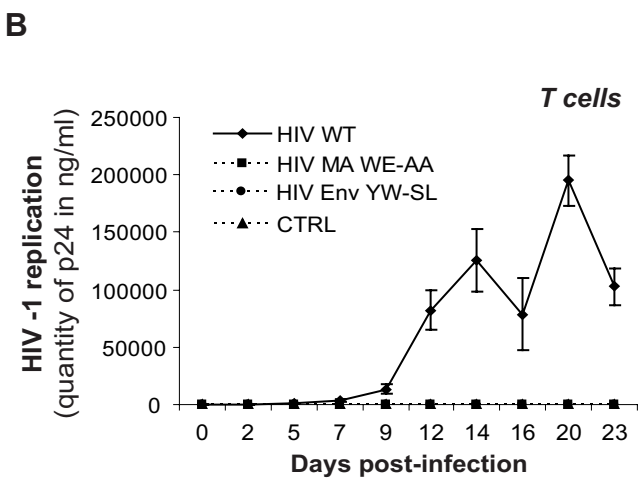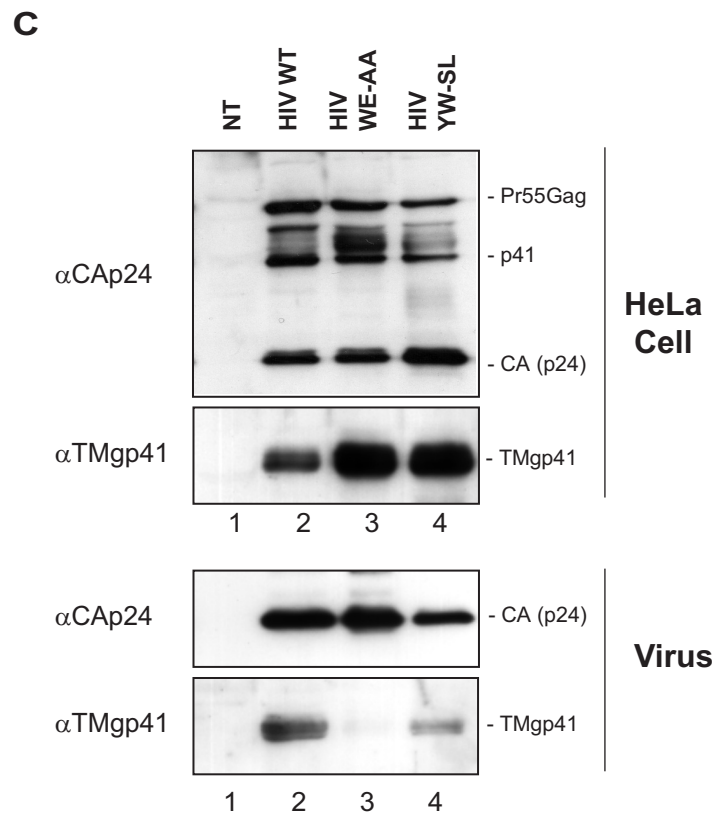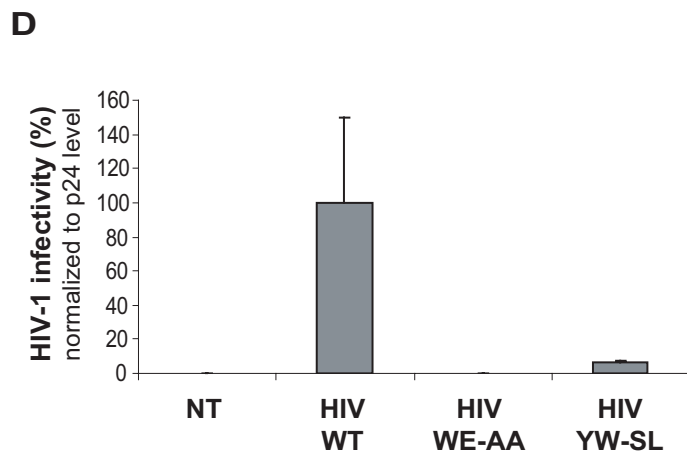

Supplement: pnas_0602941103_3.pdf [file pnas_0602941103_3.pdf]

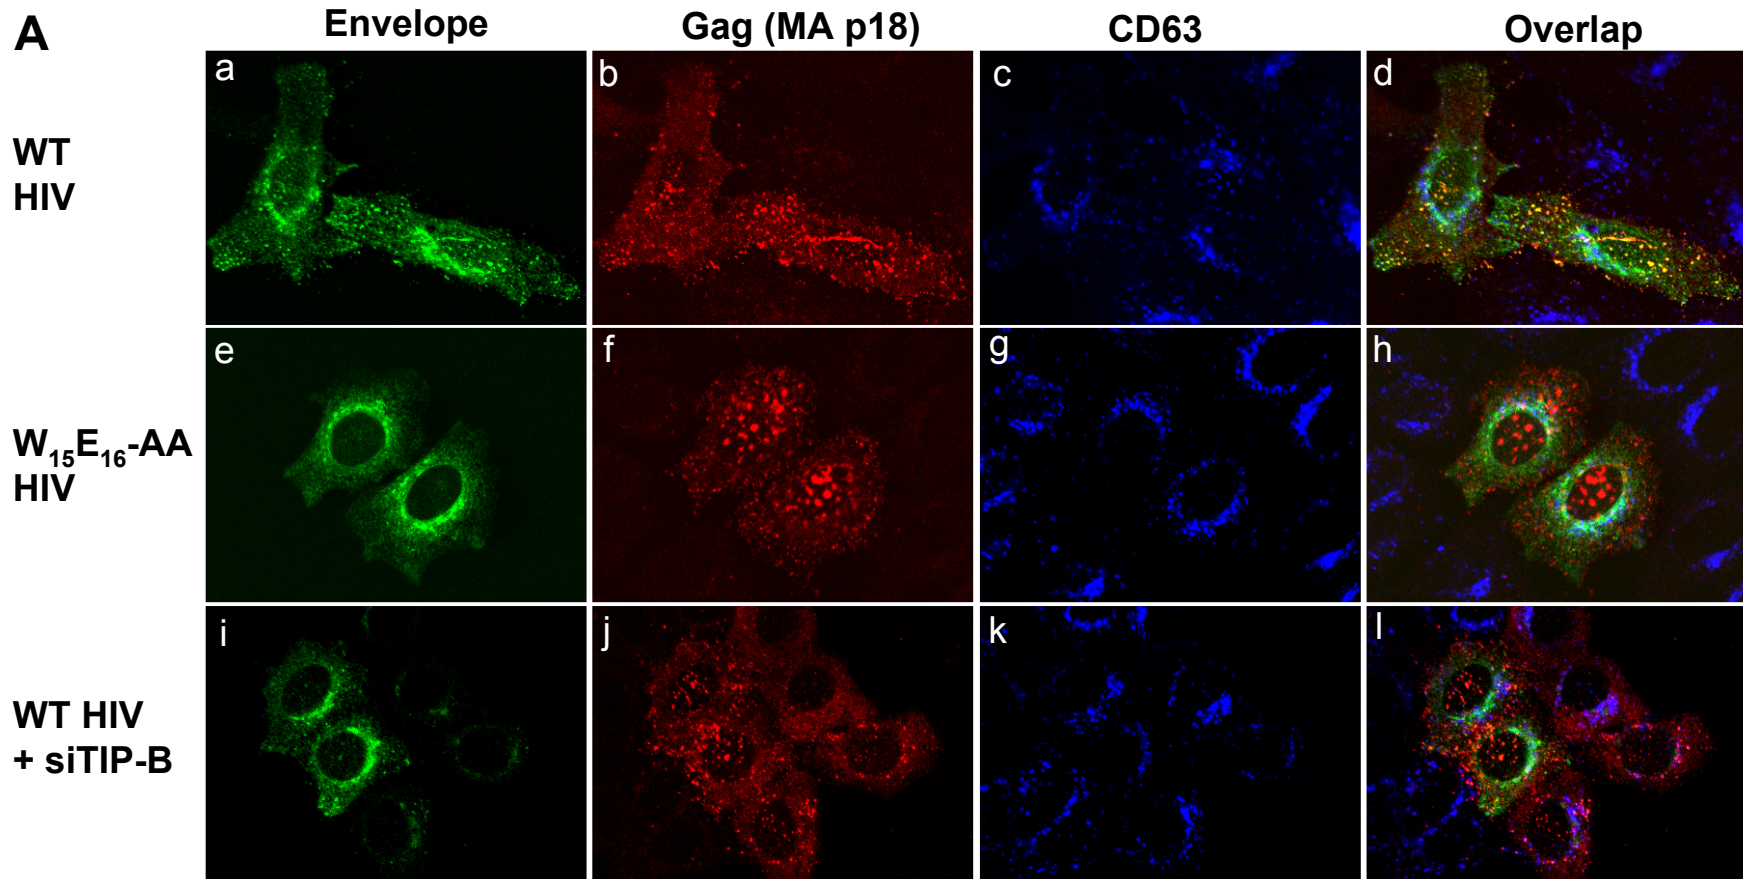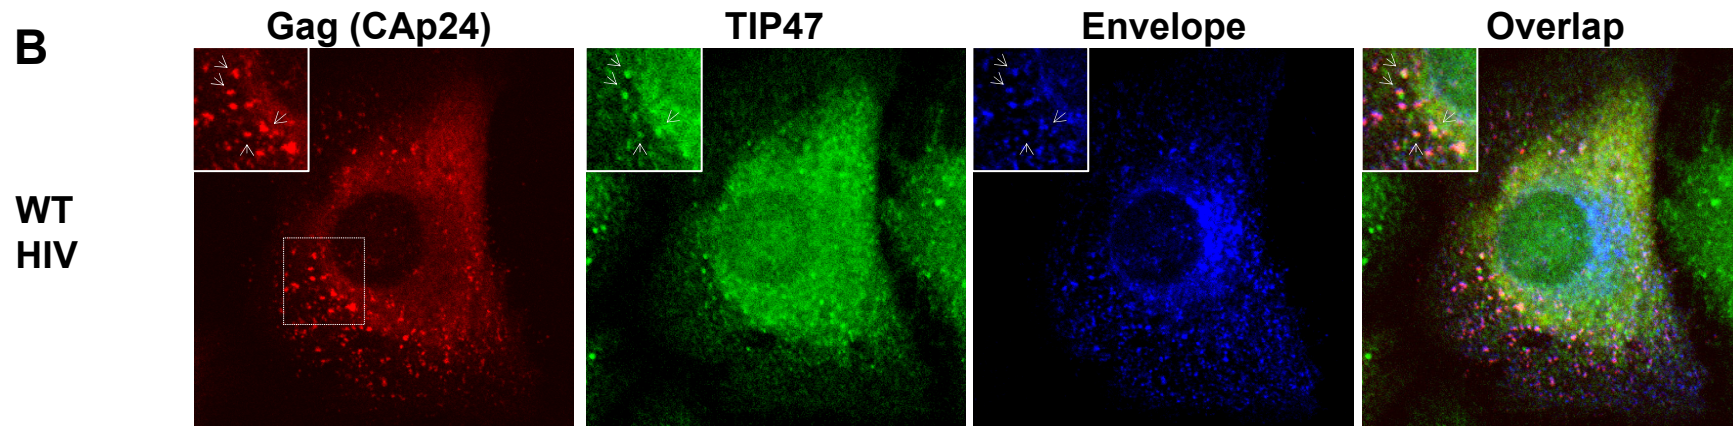

Supplement: pnas_0602941103_4.pdf [file pnas_0602941103_4.pdf]
